# Supplementary material for: Validation of microRNA-199b as A Promising Predictor of Outcome and Response to Neoadjuvant Treatment in Locally Advanced Rectal Cancer Patients
Source: MDPI journal article supplement (doi:10.3390/cancers13195003), 2021-10-05
Supplement: s1 [file s1]

**Table S3.** Univariate and multivariate Cox analyses in the cohort of 163 LARC patients.

|                    | Univariate EFS <sup>1</sup> analysis |                     |       |                  | Multivariate EFS Cox analysis |                |       |              |
|--------------------|--------------------------------------|---------------------|-------|------------------|-------------------------------|----------------|-------|--------------|
|                    |                                      | 95% CI <sup>2</sup> |       | p                |                               | 95% CI         |       | p            |
|                    | HR <sup>3</sup>                      | Lower               | Upper |                  | HR                            | Lower          | Upper |              |
| Gender             |                                      |                     |       | 0.492            |                               |                |       | -            |
| Male               | 1.000                                |                     |       |                  |                               |                |       |              |
| Female             | 0.819                                | 0.464 to 1.447      |       |                  | -                             | -              |       |              |
| Age                |                                      |                     |       | 0.225            |                               |                |       | -            |
| <70                | 1.000                                |                     |       |                  |                               |                |       |              |
| ≥70                | 1.407                                | 0.810 to 2.444      |       |                  | -                             | -              |       |              |
| ypT <sup>4</sup>   |                                      |                     |       | <b>0.020</b>     |                               |                |       | <b>0.370</b> |
| 0-2                | 1.000                                |                     |       |                  | 1.000                         |                |       |              |
| 3-4                | 1.371                                | 1.051 to 1.789      |       |                  | 1.153                         | 0.845 to 1.574 |       |              |
| ypN <sup>5</sup>   |                                      |                     |       | <b>0.001</b>     |                               |                |       | <b>0.311</b> |
| N-                 | 1.000                                |                     |       |                  | 1.000                         |                |       |              |
| N+                 | 2.601                                | 1.472 to 4.599      |       |                  | 1.459                         | 0.703 to 3.028 |       |              |
| Pathological stage |                                      |                     |       | <b>0.003</b>     |                               |                |       | <b>0.355</b> |
| 0-I                | 1.000                                |                     |       |                  | 1.000                         |                |       |              |
| II-III             | 2.392                                | 1.343 to 4.259      |       |                  | 1.457                         | 0.657 to 3.231 |       |              |
| ECOG <sup>6</sup>  |                                      |                     |       | 0.220            |                               |                |       | -            |
| 0                  | 1.000                                |                     |       |                  |                               |                |       |              |
| 1-2                | 1.427                                | 0.808 to 2.521      |       |                  | -                             | -              |       |              |
| MiR-199b           |                                      |                     |       | <b>&lt;0.001</b> |                               |                |       | <b>0.010</b> |
| High               | 1.000                                |                     |       |                  | 1.000                         |                |       |              |
| Low                | 2.829                                | 1.597 to 5.011      |       |                  | 2.213                         | 1.207 to 4.059 |       |              |

<sup>1</sup>EFS: event-free survival; <sup>2</sup>CI: confidence interval; <sup>3</sup>HR: Hazard ratio; <sup>4</sup>ypT: tumor size after chemoradiotherapy (CRT); <sup>5</sup>ypN: pathological lymph node after CRT; <sup>6</sup>ECOG: Eastern Cooperative Oncology Group.
