# Supplementary material for: Validation of microRNA-199b as A Promising Predictor of Outcome and Response to Neoadjuvant Treatment in Locally Advanced Rectal Cancer Patients
Source: MDPI journal article supplement (doi:10.3390/cancers13195003), 2021-10-05
Supplement: s1 [file s1]

**Table S1.** Evaluation of statistical associations between clinical and molecular parameters and miR-199b in 185 LARC patients.

|          | No. Cases | No. miR-199b high (%) | No. miR-199 low (%) | <i>p</i> |
|----------|-----------|-----------------------|---------------------|----------|
| MiR-199b | 185       | 144 (77.8)            | 41 (22.2)           |          |
| Age      | 185       | 144                   | 41                  | 0.491    |
| <70      | 99        | 79 (79.8)             | 20 (20.2)           |          |
| ≥70      | 86        | 65 (75.6)             | 21 (24.4)           |          |
| ECOG     | 185       | 144                   | 41                  | 0.343    |
| 0        | 124       | 94 (75.8)             | 30 (24.2)           |          |
| 1-2      | 61        | 50 (82)               | 11 (18)             |          |
| Stage    | 185       | 144                   | 41                  | 0.902    |
| I-II     | 19        | 15 (78.9)             | 4 (21.1)            |          |
| III      | 166       | 129 (77.7)            | 37 (22.3)           |          |
