# Supplementary material for: Validation of microRNA-199b as A Promising Predictor of Outcome and Response to Neoadjuvant Treatment in Locally Advanced Rectal Cancer Patients
Source: MDPI journal article supplement (doi:10.3390/cancers13195003), 2021-10-05
Supplement: s1 [file s1]

**Table S2.** Association between mir-199b expression and tumor size or lymph node positivity in 163 LARC patients.

|            | No. Cases  | No. miR-199b high (%) | No. miR-199 low (%) | <i>p</i>     |
|------------|------------|-----------------------|---------------------|--------------|
| <b>ypT</b> | <b>163</b> | <b>124</b>            | <b>39</b>           | <b>0.007</b> |
| 0-1        | 44         | 40 (32.3)             | 4 (10.3)            |              |
| >1         | 119        | 84 (67.7)             | 35 (89.7)           |              |
| <b>ypN</b> | <b>163</b> | <b>124</b>            | <b>39</b>           | <b>0.002</b> |
| N0         | 122        | 100 (80.6)            | 22 (56.4)           |              |
| N+         | 41         | 24 (19.4)             | 17 (43.6)           |              |
